# Supplementary material for: NPA-Cu2+ Complex as a Fluorescent Sensing Platform for the Selective and Sensitive Detection of Glyphosate
Source: MDPI journal article supplement (doi:10.3390/ijms22189816), 2021-09-10
Supplement: s1 [file s1]

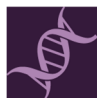

## Supplementary Materials

### 1. The Spectra of Structural Characterization of NPA

$^1\text{H}$  NMR (400 MHz,  $\text{DMSO}-d_6$ )  $\delta$  11.48 (s, 1H), 10.23 (s, 1H), 8.82 (d,  $J = 5.9$  Hz, 1H), 8.49 (d,  $J = 7.3$  Hz, 1H), 8.39 (d,  $J = 8.5$  Hz, 1H), 7.85 (d,  $J = 7.8$  Hz, 1H), 7.82 – 7.77 (m, 1H), 7.66 (d,  $J = 8.5$  Hz, 1H), 7.26 (t,  $J = 7.7$  Hz, 1H), 6.96 – 6.90 (m, 2H), 4.06 – 4.01 (m, 2H), 1.65 – 1.57 (m, 2H), 1.35 (m,  $J = 7.4$  Hz, 2H), 0.93 (t,  $J = 7.4$  Hz, 3H).  $^{13}\text{C}$  NMR (100 MHz,  $\text{DMSO}-d_6$ )  $\delta$  164.02, 163.36, 149.94, 148.27, 146.53, 140.92, 134.01, 133.69, 131.31, 131.22, 129.45, 128.61, 125.50, 124.62, 122.46, 119.13, 112.00, 107.65, 40.02, 30.23, 20.31, 14.19. HRMS (ESI): calculated for  $\text{C}_{22}\text{H}_{20}\text{N}_4\text{O}_2$   $[\text{M} + \text{H}]^+$  373.1658, found 373.1659.

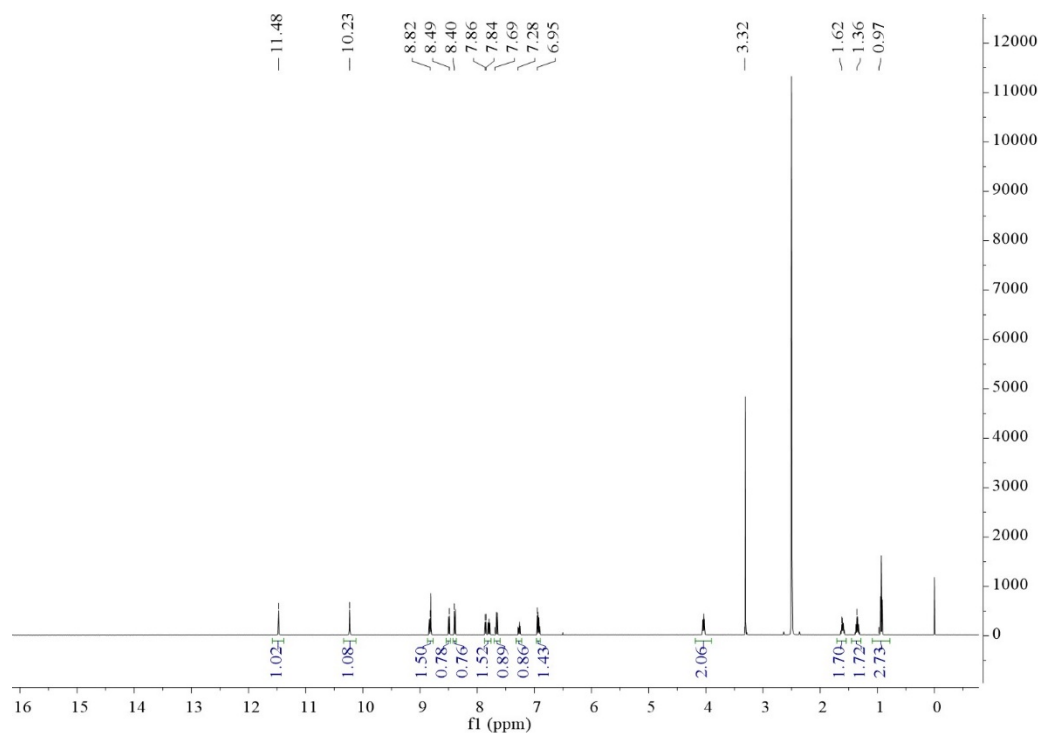

Figure S1.  $^1\text{H}$  NMR spectrum of compound NPA.

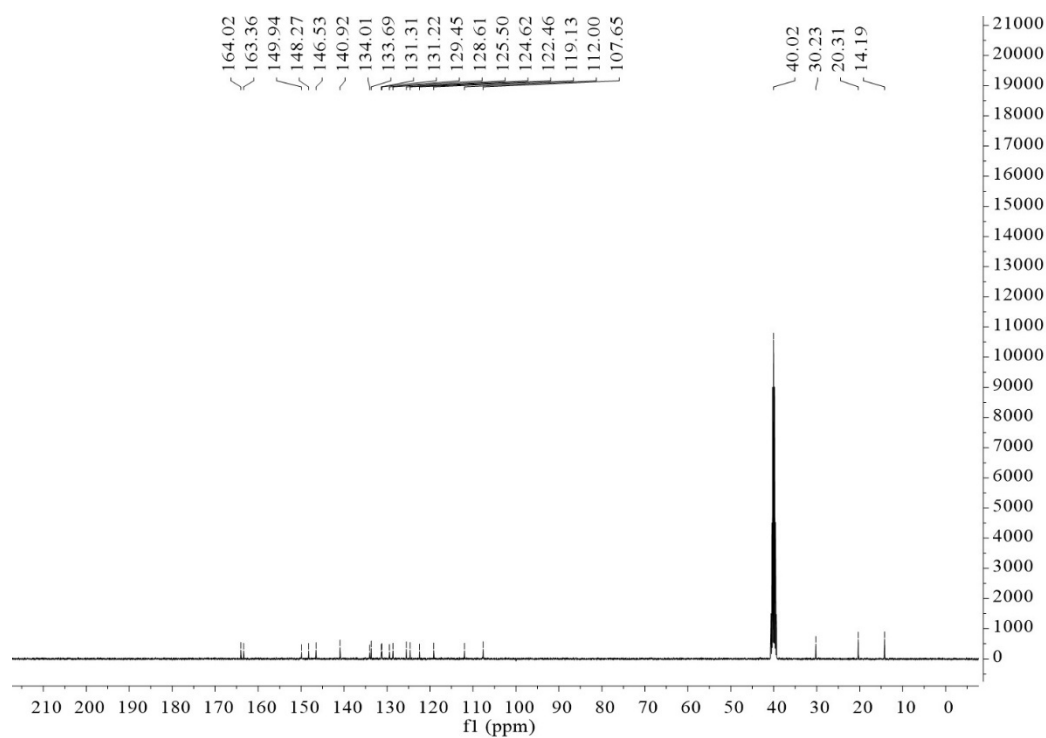Figure S2.  $^{13}\text{C}$  NMR spectrum of compound *NPA*.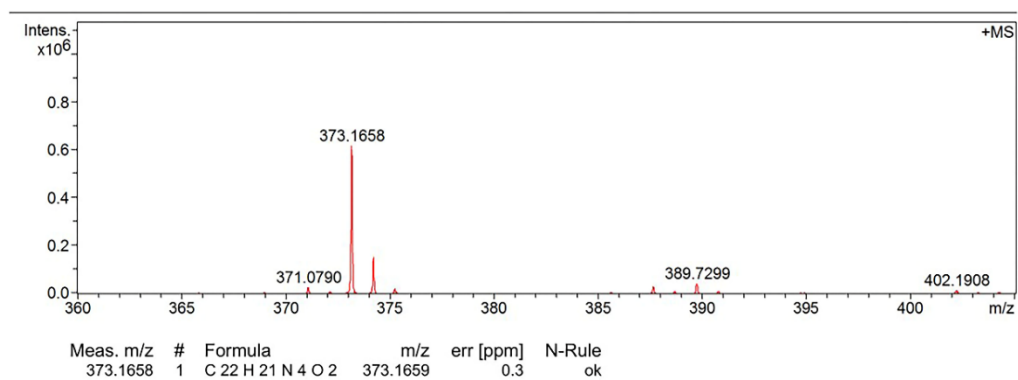Figure S3. Mass Spectrum ( $\text{M}+\text{H}^+$ ) of compound *NPA*.

## 2. Spectral Characteristics of Probe NPA upon Coordination with $\text{Cu}^{2+}$

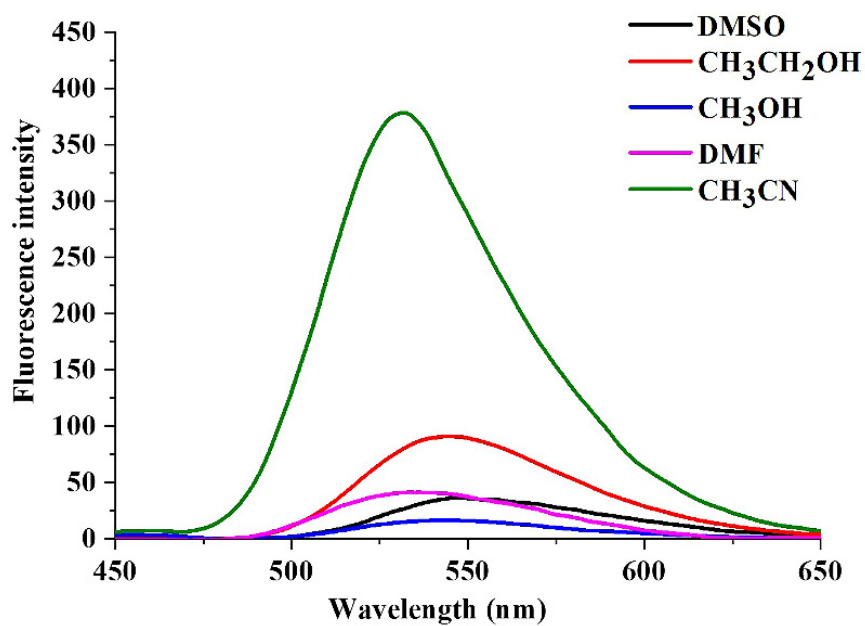

Figure S4. Fluorescence spectra of NPA in different solvents.

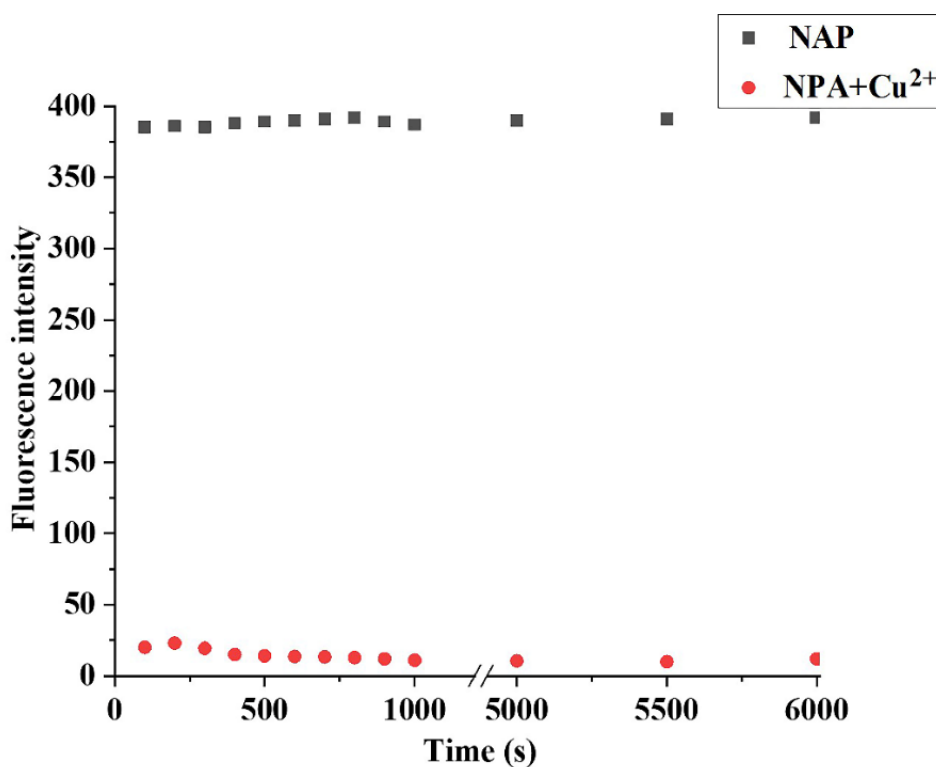

Figure S5. Stability of time on fluorescence intensity of NPA.

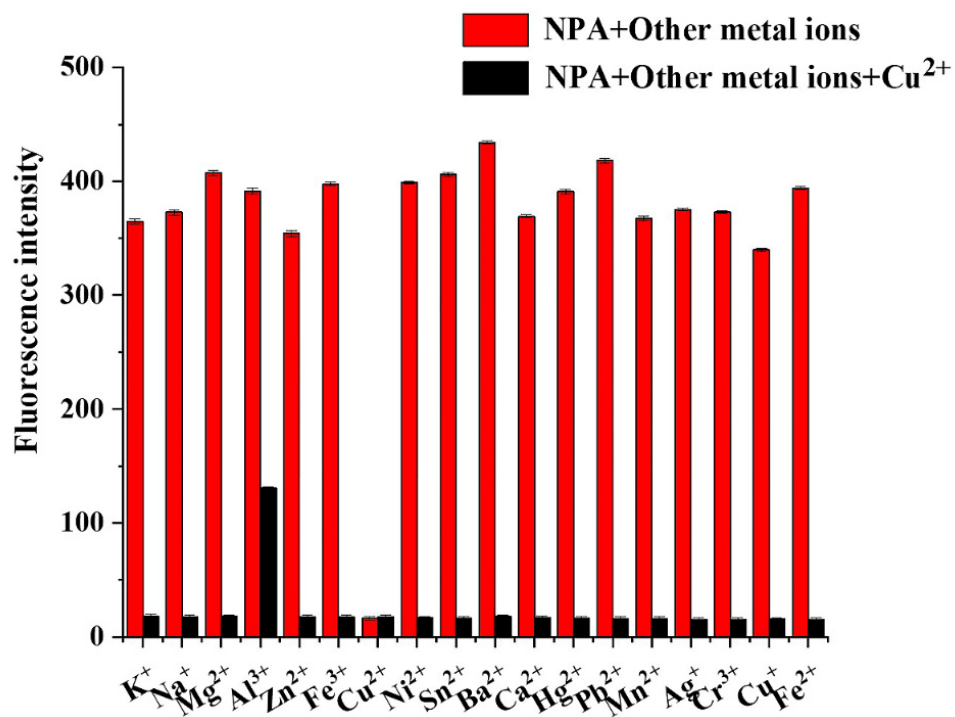

Figure S6. Fluorescence response of NPA–Cu<sup>2+</sup> by adding various metal ions.

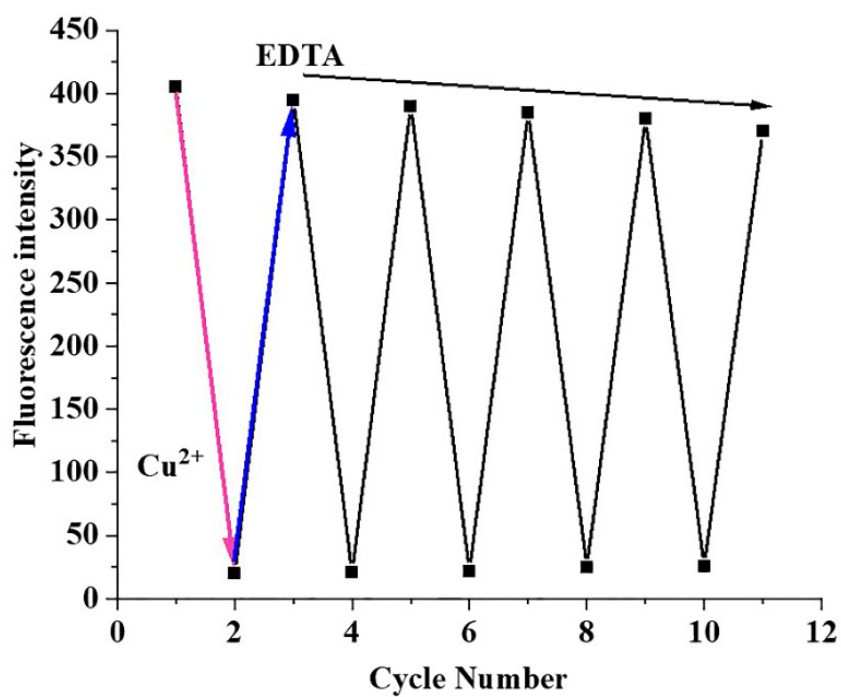

Figure S7. Reversible changes in the fluorescence intensity upon the sequential introduction of Cu<sup>2+</sup> and EDTA in CH<sub>3</sub>CN.

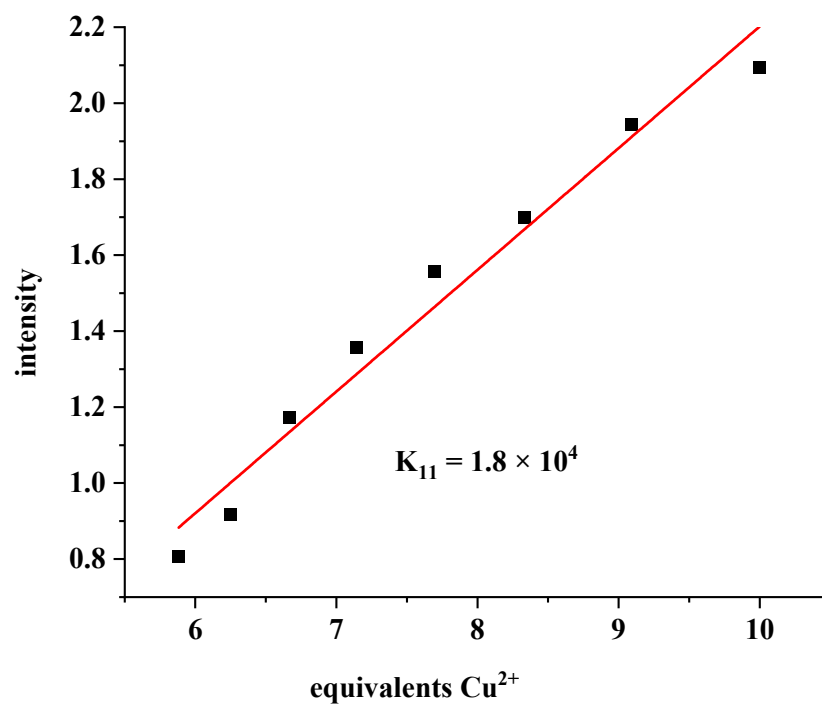

**Figure S8.** Host-Guest interaction BindFit of NPA and Cu<sup>2+</sup>.

### 3. Sensing Assay for Glyphosate by NPA-Cu<sup>2+</sup>

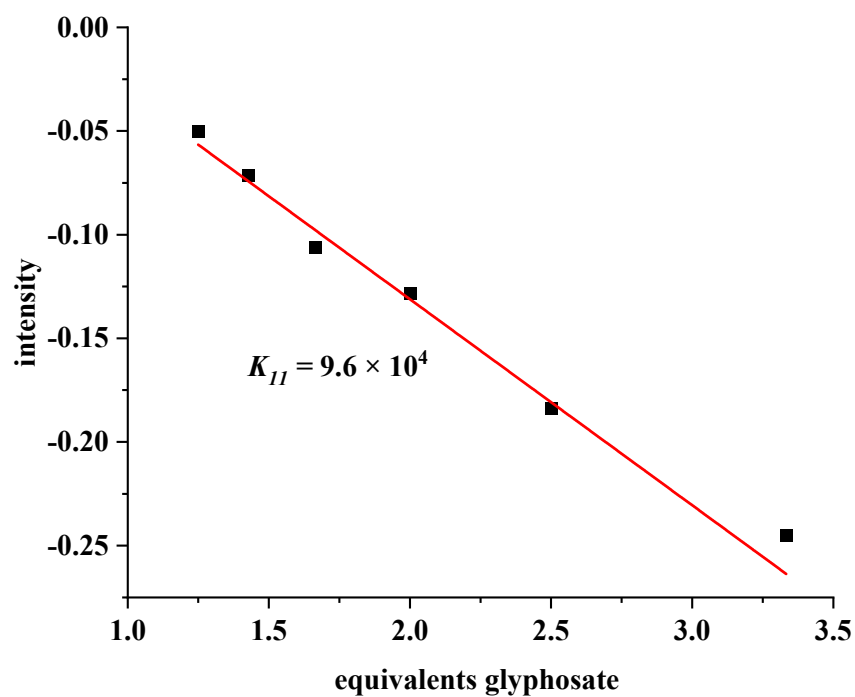

Figure S9 Host-Guest interaction BindFit of NPA-Cu<sup>2+</sup> and glyphosate.

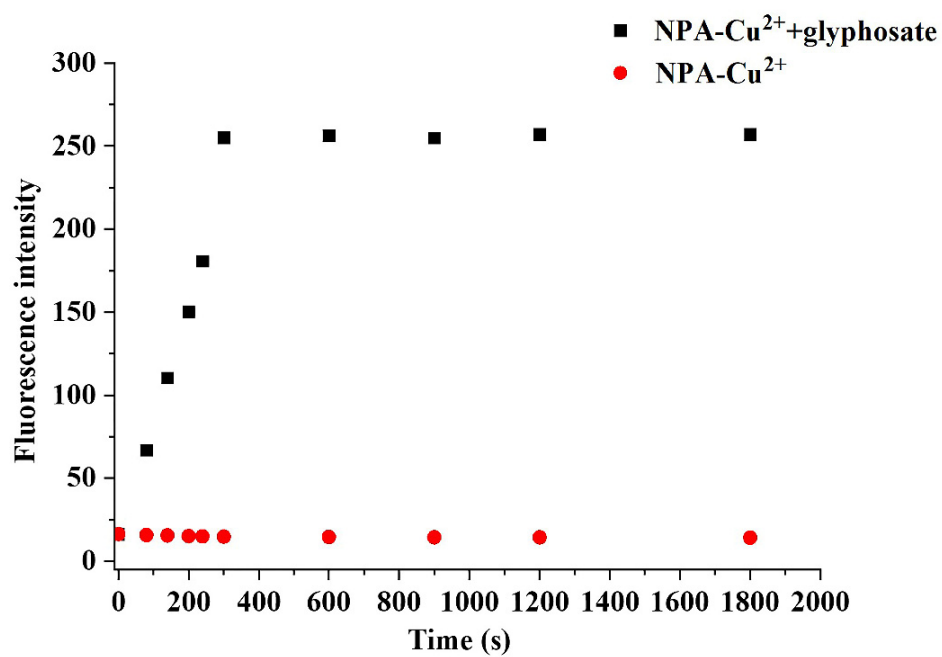

Figure S10. Stability of time on fluorescence intensity of NPA-Cu<sup>2+</sup>.

#### 4. Comparison of NPA with Previously Published Probes for Cu<sup>2+</sup> Ions

**Table S1.** Comparison of NPA with previously published probes for Cu<sup>2+</sup> ions.

| Sensing Mechanism | Probes                                                                              | Working Media                                                | LOD (μM) | References |
|-------------------|-------------------------------------------------------------------------------------|--------------------------------------------------------------|----------|------------|
| Hydrolysis        | 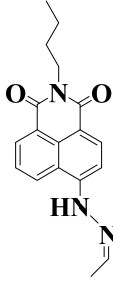   | CH <sub>3</sub> CN-HEPES<br>(4:1, v/v, pH = 7.4)             | 0.32     | [35]       |
| ICT               |    | DMSO/H <sub>2</sub> O<br>(v/v ,8/2)                          | 0.22     | [36]       |
| ICT               |   | CH <sub>3</sub> CN-H <sub>2</sub> O (v/v = 2:8, pH = 5)      | 0.22     | [37]       |
| PET               |  | CH <sub>3</sub> CN-H <sub>2</sub> O<br>(v/v = 3:7, pH = 7.0) | 0.71     | [43]       |
| PET               |  | CH <sub>3</sub> CN                                           | 0.21     | This work  |

## References

35. Fu, Y.; Pang, X.-X.; Wang, Z.-Q.; Chai, Q.; Ye, F. A highly sensitive and selective fluorescent probe for determination of Cu (II) and application in live cell imaging. *Spectrochim. Acta Part A: Mol. Biomol. Spectrosc.* **2019**, *208*, 198–205, doi:10.1016/j.saa.2018.10.005.
36. Bhorge, Y.R.; Tsai, H.-T.; Huang, K.-F.; Pape, A.J.; Janaki, S.N.; Yen, Y.-P. A new pyrene-based Schiff-base: A selective colorimetric and fluorescent chemosensor for detection of Cu(II) and Fe(III). *Spectrochim. Acta Part A: Mol. Biomol. Spectrosc.* **2014**, *130*, 7–12, doi:10.1016/j.saa.2014.03.110.
37. Xiong, J.-J.; Huang, P.-C.; Zhang, C.-Y.; Wu, F.-Y. Colorimetric detection of Cu<sup>2+</sup> in aqueous solution and on the test kit by 4-aminoantipyrine derivatives. *Sensors Actuators B: Chem.* **2016**, *226*, 30–36, doi:10.1016/j.snb.2015.11.113.
43. Bao, Z.; Qin, C.; Wang, J.-J.; Sun, J.; Dai, L.; Chen, G.; Mei, F. A sensitive and selective probe for visual detection of Cu<sup>2+</sup> based on 1, 8-naphthalimidederivative. *Sensors Actuators B: Chem.* **2018**, *265*, 234–241, doi:10.1016/j.snb.2018.03.050.
